# Supplementary material for: Efficacy and Safety of Coadministered Ezetimibe–Rosuvastatin plus Telmisartan in South Korean Patients with Dyslipidemia and Hypertension: A Multicenter, Randomized, Double-Blind, Active-Controlled, Phase III Trial
Source: MDPI journal article supplement (doi:10.3390/jcm12062377), 2023-03-19
Supplement: s1 [file s1]

## Supplementary Information

**Table S1. Definition of randomization criteria.**

|                                                                                                                                                                                                                                                                                                                                                                                                                                                                                                                                                                                                                                                                                                                                                                                                                                                                                                                                                                         |                                                                                                                                                                                                                                                                                                                                                                                                                                                                                                                                                                                                                                                                                                                                            |
|-------------------------------------------------------------------------------------------------------------------------------------------------------------------------------------------------------------------------------------------------------------------------------------------------------------------------------------------------------------------------------------------------------------------------------------------------------------------------------------------------------------------------------------------------------------------------------------------------------------------------------------------------------------------------------------------------------------------------------------------------------------------------------------------------------------------------------------------------------------------------------------------------------------------------------------------------------------------------|--------------------------------------------------------------------------------------------------------------------------------------------------------------------------------------------------------------------------------------------------------------------------------------------------------------------------------------------------------------------------------------------------------------------------------------------------------------------------------------------------------------------------------------------------------------------------------------------------------------------------------------------------------------------------------------------------------------------------------------------|
| <b>Hypertension</b>                                                                                                                                                                                                                                                                                                                                                                                                                                                                                                                                                                                                                                                                                                                                                                                                                                                                                                                                                     | 140 mmHg $\leq$ MSSBP <180 mmHg measured at randomization, or 130 mmHg $\leq$ MSSBP <180 mmHg for patients with diabetes or chronic kidney disease (but only for patients with albuminuria or proteinuria).                                                                                                                                                                                                                                                                                                                                                                                                                                                                                                                                |
| <b>Dyslipidemia</b>                                                                                                                                                                                                                                                                                                                                                                                                                                                                                                                                                                                                                                                                                                                                                                                                                                                                                                                                                     | LDL-C levels and TG criteria measured at the time of randomization corresponding to one of the following criteria according to cardiovascular risk factors:                                                                                                                                                                                                                                                                                                                                                                                                                                                                                                                                                                                |
|                                                                                                                                                                                                                                                                                                                                                                                                                                                                                                                                                                                                                                                                                                                                                                                                                                                                                                                                                                         | <ol style="list-style-type: none"> <li>1) Cardiovascular Risk Factors<sup>a</sup> <math>\leq</math>1; 160 <math>\leq</math>LDL-C <math>\leq</math>250 mg/dL; TG &lt;400 mg/dL</li> <li>2) Cardiovascular Risk Factors<sup>a</sup> <math>\geq</math>2; 10-year risk<sup>c</sup> &lt;10%; 160 <math>\leq</math>LDL-C <math>\leq</math> 250 mg/dL; TG &lt; 400 mg/dL</li> <li>3) Cardiovascular Risk Factors<sup>a</sup> <math>\geq</math>2; 10% <math>\leq</math>10-year risk<sup>c</sup> <math>\leq</math>20%; 130 <math>\leq</math>LDL-C <math>\leq</math> 250 mg/dL; TG &lt; 400 mg/dL</li> <li>4) Coronary artery disease or equivalent<sup>b</sup>; 100 <math>\leq</math>LDL-C <math>\leq</math>250 mg/dL; TG &lt; 400 mg/dL</li> </ol> |
| <p><sup>a</sup> Current smoking, diastolic blood pressure, DBP <math>\geq</math>90 mmHg, high density lipoprotein cholesterol, HDL-C &lt;40 mg/dL (If HDL-C <math>\geq</math>60 mg/dL, one is subtracted from the total number of risk factors, considered as a protective factor), family history of premature coronary heart disease (&lt; 55 years for first-degree male relatives and &lt; 65 years for female relatives), aged <math>\geq</math> 45 years old for males or <math>\geq</math> 55 years old for female</p> <p><sup>b</sup> Diabetes: fasting plasma glucose (FPG) <math>\geq</math>126 mg/dL or HbA1c <math>\geq</math>6.5% at screening, or those already diagnosed and receiving treatment for diabetes, or clinically significant coronary and peripheral arterial disease (atherosclerosis, abdominal aortic aneurysm, carotid artery disease, etc.), 10-year risk &gt; 20%</p> <p><sup>c</sup> 10-year risk based on Framingham risk score.</p> |                                                                                                                                                                                                                                                                                                                                                                                                                                                                                                                                                                                                                                                                                                                                            |

**Table S2. Overall summary of disposition and analysis set.**

|                      | <b>Eze/Ros 10/20 mg +<br/>Tel 80 mg</b> | <b>Eze/Ros 10/20 mg</b> | <b>Tel 80 mg</b> | <b>Total</b> |
|----------------------|-----------------------------------------|-------------------------|------------------|--------------|
| Screening, n         |                                         |                         |                  | 341          |
| Screening Failure, n |                                         |                         |                  | 159          |
| Randomized, n (%)    | 61                                      | 61                      | 60               | 182          |
| Treated              | 61(100.00)                              | 60(98.36)               | 60(100.00)       | 181(99.45)   |
| Non-Treated          | 0                                       | 1(1.64)                 | 0                | 1(0.55)      |
| Status, n (%)        |                                         |                         |                  |              |
| Completion           | 58(95.08)                               | 58(95.08)               | 55(91.67)        | 171(93.96)   |
| Discontinuation      | 3(4.92)                                 | 3(4.92)                 | 5(8.33)          | 11(6.04)     |
| Efficacy Sets, n (%) |                                         |                         |                  |              |
| Full Analysis Set    | 60(98.36)                               | 60(98.36)               | 60(100.00)       | 180(98.89)   |
| Per-Protocol Set     | 52(85.25)                               | 48(78.69)               | 45(75.00)        | 145(79.67)   |
| Safety Set, n (%)    | 61(100.00)                              | 60(98.36)               | 60(100.00)       | 181(99.45)   |

**Table S3. Change from Baseline in MSDBP at Weeks 4 and 8.**

|                                                                                                                                                                                                                                               | <b>Eze/Ros 10/20 mg +<br/>Tel 80 mg (n=60)</b> | <b>Eze/Ros 10/20 mg<br/>(n=60)</b> | <b>Tel 80 mg<br/>(n=60)</b> |
|-----------------------------------------------------------------------------------------------------------------------------------------------------------------------------------------------------------------------------------------------|------------------------------------------------|------------------------------------|-----------------------------|
| Baseline                                                                                                                                                                                                                                      | 88.59±10.59                                    | 89.74±9.04                         | 87.85±9.84                  |
| Week 4                                                                                                                                                                                                                                        | 76.49±9.33                                     | 87.87±11.22                        | 80.97±10.21                 |
| MMRM                                                                                                                                                                                                                                          |                                                |                                    |                             |
| LS Means (SE)                                                                                                                                                                                                                                 | -11.11(1.24)                                   | -0.76(1.28)                        | -5.96(1.28)                 |
| LS Mean Difference (SE)                                                                                                                                                                                                                       |                                                | -10.35(1.39)                       | -5.15(1.39)                 |
| 95%CI                                                                                                                                                                                                                                         |                                                | [-13.08, -7.62]                    | [-7.90, -2.40]              |
| p-value                                                                                                                                                                                                                                       |                                                | <0.0001                            | 0.0003                      |
| Week 8                                                                                                                                                                                                                                        | 75.35±9.73                                     | 87.31±12.63                        | 81.15±9.59                  |
| MMRM                                                                                                                                                                                                                                          |                                                |                                    |                             |
| LS Mean (SE)                                                                                                                                                                                                                                  | -13.20(1.32)                                   | -1.17(1.38)                        | -6.20(1.40)                 |
| LS Mean Difference (SE)                                                                                                                                                                                                                       |                                                | -12.03(1.56)                       | -7.00(1.58)                 |
| 95%CI                                                                                                                                                                                                                                         |                                                | [-15.10, -8.96]                    | [-10.12, -3.89]             |
| p-value                                                                                                                                                                                                                                       |                                                | <0.0001                            | <0.0001                     |
| Abbreviations: CI, Confidence Interval; Eze, Ezetimibe; LS Mean (SE), Least-Square Mean (Standard Error); MMRM, Mixed effect Models for Repeated Measures; MSDBP, Mean Sitting Diastolic Blood Pressure; Ros, Rosuvastatin; Tel, Telmisartan. |                                                |                                    |                             |
